# Supplementary material
Source: HighWire-hosted journal article supplement (https://openres.ersjournals.com/content/6/1/00196-2019)
Supplement: inline-supplementary-material-1 [file inline-supplementary-material-1.pdf]

## SUPPLEMENTARY INFORMATION

### **TITLE: The stability of the ADO score among UK COPD patients from The Health Improvement Network**

**Authors' full names:** Spencer J. Keene, MSc<sup>1,2,4</sup>, Peymane Adab\*, MD<sup>1</sup>, Frank de Vries, PharmD Ph.D.<sup>2,3</sup>, Frits M.E. Franssen, PhD<sup>4,5,6</sup>, Alice Sitch, MSc<sup>1</sup>, James Martin, Ph.D.<sup>1</sup>, Tom Marshall, Ph.D.<sup>1</sup>, Rachel Jordan Ph.D.<sup>1</sup>

#### **Authors' affiliation(s):**

<sup>1</sup> Institute of Applied Health Research, College of Medical and Dental Sciences, University of Birmingham, Birmingham, United Kingdom.

<sup>2</sup> Department of Clinical Pharmacy and Toxicology, Maastricht University Medical Centre+, Maastricht, the Netherlands

<sup>3</sup> Utrecht Institute for Pharmaceutical Sciences Utrecht University, Utrecht The Netherlands.

<sup>4</sup> CIRO+, Horn, the Netherlands

<sup>5</sup> Department of Respiratory Medicine, Maastricht University Medical Centre (MUMC+), Maastricht, the Netherlands

<sup>6</sup> NUTRIM School for Nutrition and Translational Research in Metabolism, Maastricht University, Maastricht, the Netherlands.

#### **Appendix S1- Rules used to convert raw FEV1 into FEV1% predicted**

FEV1% predicted: For certain observations, it was necessary to convert raw FEV1 values to FEV1% predicted. FEV1 units were extracted from THIN and showed that raw FEV1 may be in liters, % predicted, or with a missing unit. The FEV1 unit variable had substantially more missingness than the raw FEV1 and was thus found to be unreliable. We used four assumptions to translate raw FEV1 into % predicted.

1. If raw FEV1 was greater than or equal to 0.1 and less than 0.3 then these values were multiplied by 100 to obtain FEV1% predicted.
2. If the FEV1 raw value was greater than or equal to 10 and less than or equal to 160 then it was assumed that this was already FEV1% predicted.
3. If raw FEV1 was less than 10 and greater than or equal to 0.3, this represented a liter value. In these instances, we had to calculate expected FEV1 values for each patient for each year using that patient's age, height, and gender. The equation (called HSE) to calculate expected FEV1 values was developed specifically for the English population (1) and gives very similar results to the GLI equations (2), the latter of which seemed more suitable for more diverse populations and for international cohorts. The HSE equation is given below.

Manuscript submission template:

$$expectedFEV1 = e^{(intercept+b1[age]+b2[age^2]+b3(\ln[height]))}$$

4. If after 1 through 3, the converted FEV1% predicted remained greater than 160 or less than 10, then we assumed that these were errors and we converted these measurements to missing observations.

**Table S1-** *Assignment of points for the updated ADO score*

| Points          | 0       | 1       | 2       | 3       | 4       | 5       | 7   |
|-----------------|---------|---------|---------|---------|---------|---------|-----|
| Age (in years)  | 40 - 49 |         | 50 - 59 |         | 60 - 69 | 70 - 79 | ≥80 |
| Dyspnoea (mMRC) | 0       | 1 - 2   | 3       | 4       |         |         |     |
| FEV1% predicted | ≥81     | 65 - 80 | 51 - 64 | 36 - 50 | ≤35     |         |     |

**Table S2- Assignment of points for the updated ADO score****Baseline characteristics of patients included and excluded in the ADO change analysis based upon sufficient number of ADO measurements ( $\geq 3$ )**

| Characteristics                           | $\geq 3$ ADO Measurements<br>(N= 4,804) | < 3 ADO Measurements<br>(N= 60,720) | Total<br>(N= 65,524) |
|-------------------------------------------|-----------------------------------------|-------------------------------------|----------------------|
| Age – Mean(SD)                            | 68.9 (9.3)                              | 72.6 (11.3)                         | 72.3 (11.2)          |
| Dyspnoea (mMRC Score) – N(%)              |                                         |                                     |                      |
| 0                                         | 859 (17.9)                              | 5,686 (16.2)                        | 6,545 (16.4)         |
| 1                                         | 1,883 (39.2)                            | 12,827 (36.5)                       | 14,710 (36.8)        |
| 2                                         | 1,323 (27.5)                            | 9,285 (26.4)                        | 10,608 (26.6)        |
| 3                                         | 666 (13.9)                              | 5,873 (16.7)                        | 6,539 (16.4)         |
| 4                                         | 73 (1.5)                                | 1,453 (4.1)                         | 1,526 (3.8)          |
| missing                                   | 0                                       | 25596                               | 25596                |
| FEV1% predicted – Mean(SD)                | 59.3 (19.7)                             | 59.8 (21.7)                         | 59.7 (21.5)          |
| First ADO score – Mean(SD)                | 7.4 (2.1)                               | 7.6 (2.3)                           | 7.6 (2.3)            |
| No. of Females – N(%)                     | 2,151 (44.8)                            | 28,361 (46.7)                       | 30,512 (46.6)        |
| Country – N(%)                            |                                         |                                     |                      |
| England                                   | 3,577 (74.5)                            | 44,984 (74.1)                       | 48,561 (74.1)        |
| Northern Ireland                          | 275 (5.7)                               | 2,940 (4.8)                         | 3,215 (4.9)          |
| Scotland                                  | 382 (8.0)                               | 5,514 (9.1)                         | 5,896 (9.0)          |
| Wales                                     | 570 (11.9)                              | 7,282 (12.0)                        | 7,852 (12.0)         |
| Townsend deprivation quintile - N(%)      |                                         |                                     |                      |
| 1 – least deprived                        | 815 (17.3)                              | 9,955 (16.7)                        | 10,770 (16.8)        |
| 2                                         | 880 (18.7)                              | 10,727 (18.0)                       | 11,607 (18.1)        |
| 3                                         | 1,032 (21.9)                            | 12,648 (21.2)                       | 13,680 (21.3)        |
| 4                                         | 1,058 (22.5)                            | 14,174 (23.8)                       | 15,232 (23.7)        |
| 5 – most deprived                         | 924 (19.6)                              | 12,101 (20.3)                       | 13,025 (20.3)        |
| missing                                   | 95                                      | 1115                                | 1210                 |
| Cigarette smoking – N(%)                  |                                         |                                     |                      |
| Current                                   | 1,301 (28.7)                            | 17,479 (32.3)                       | 18,780 (32.1)        |
| Former                                    | 2,638 (58.3)                            | 29,116 (53.9)                       | 31,754 (54.2)        |
| Never                                     | 588 (13.0)                              | 7,449 (13.8)                        | 8,037 (13.7)         |
| missing                                   | 277                                     | 6676                                | 6953                 |
| BMI category – N(%)                       |                                         |                                     |                      |
| Underweight (<18.5 kg/m <sup>2</sup> )    | 124 (2.7)                               | 3,396 (6.5)                         | 3,520 (6.2)          |
| Normal (18.5 - < 25 kg/m <sup>2</sup> )   | 1,480 (32.6)                            | 19,604 (37.4)                       | 21,084 (37.0)        |
| Overweight (25 - < 30 kg/m <sup>2</sup> ) | 1,675 (36.9)                            | 16,669 (31.8)                       | 18,344 (32.2)        |
| Obese ( $\geq 30$ kg/m <sup>2</sup> )     | 1,263 (27.8)                            | 12,813 (24.4)                       | 14,076 (24.7)        |
| missing                                   | 262                                     | 8238                                | 8500                 |
| LAMA prescription – N(%)                  | 1,332 (27.7)                            | 12,519 (20.6)                       | 13,851 (21.1)        |
| LABA prescription – N(%)                  | 1,477 (30.8)                            | 12,097 (19.9)                       | 13,574 (20.7)        |
| SAMA prescription – N(%)                  | 777 (16.2)                              | 5,521 (9.1)                         | 6,298 (9.6)          |
| SABA prescription – N(%)                  | 2,848 (59.3)                            | 26,231 (43.2)                       | 29,079 (44.4)        |
| ICS containing prescription – N(%)        | 1,645 (34.2)                            | 13,472 (22.2)                       | 15,117 (23.1)        |
| PR referral - N(%)                        | 211 (4.4)                               | 1,416 (2.3)                         | 1,627 (2.5)          |
| Heart Failure – N(%)                      | 245 (5.1)                               | 5,985 (9.9)                         | 6,230 (9.5)          |
| Ischemic Heart Disease – N(%)             | 934 (19.4)                              | 13,753 (22.7)                       | 14,687 (22.4)        |
| Anxiety – N(%)                            | 109 (2.3)                               | 1,378 (2.3)                         | 1,487 (2.3)          |
| Depression – N(%)                         | 305 (6.4)                               | 3,080 (5.1)                         | 3,385 (5.2)          |
| Diabetes – N(%)                           | 593 (12.3)                              | 8,135 (13.4)                        | 8,728 (13.3)         |
| TIA, stroke, PAD – N(%)                   | 589 (12.3)                              | 10,264 (16.9)                       | 10,853 (16.6)        |
| Asthma – N(%)                             | 1,730 (36.0)                            | 19,362 (31.9)                       | 21,092 (32.2)        |

For patients without a single calculable ADO score, a random pseudo study entry date was assigned based on the distribution of the study entry dates among included patients. Age, mMRC score, and FEV1% predicted were used to

## Manuscript submission template:

*calculate the first ADO score in the table. Abbreviations: BMI= body-mass index, LAMA= long-acting muscarinic antagonist, LABA= long-acting beta2 Agonists, mMRC= modified Medical Research Council, FEV= forced expiratory volume, ICS= inhaled corticosteroids, PR= Pulmonary Rehabilitation, TIA= transient Ischemic attack, PAD= Peripheral artery disease*

## REFERENCES

1. Falaschetti E, Laiho J, Primatesta P, Purdon S. Prediction equations for normal and low lung function from the health survey for England. *Eur Respir J.* 2004;23(3):456–63.
2. Quanjer PH, Stanojevic S, Cole TJ, Baur X, Hall GL, Culver BH, Enright PL, Hankinson JL, Ip MSM, Zheng J, Stocks J. Multi-ethnic reference values for spirometry for the 3-95-yr age range: The global lung function 2012 equations. *Eur Respir J.* 2012;40(6):1324–43.
